# Supplementary material
Source: HighWire-hosted journal article supplement (https://bmjopen.bmj.com/content/7/8/e015393)
Supplement: inline-supplementary-material-1 [file inline-supplementary-material-1.pdf]

# Making a balanced plate for pregnant women to improve birthweight of infants: a cluster randomised controlled trial in rural Bangladesh

Information regarding socio-economic and demographic condition will be collected from all enrolled pregnant women from both the control and intervention arms at the beginning of the project.

ID No: 

|  |  |  |  |
|--|--|--|--|
|  |  |  |  |
|--|--|--|--|

| Day |  | Month |  | Year |  |  |  |
|-----|--|-------|--|------|--|--|--|
|     |  |       |  |      |  |  |  |

 Date:

Pregnant woman's name: \_\_\_\_\_

Husband's name: \_\_\_\_\_

Upazila: \_\_\_\_\_

Name of Shasthya Shebika: \_\_\_\_\_

Union: \_\_\_\_\_

Name of Shasthya Kormi: \_\_\_\_\_

Village: \_\_\_\_\_

Name of PO: \_\_\_\_\_

Respondent: 

|     |
|-----|
| 1.1 |
| 1.2 |

 Pregnant woman who received nutrition intervention  
Pregnant woman who did not received nutrition intervention

## INFORMED CONSENT

Assalamu Alaikum/Adab,

I work for an organization named, BRAC. It is known that during pregnancy women should take adequate diet for betterment of the infants and women themselves. To improve nutritional knowledge and practice and thus increase weight of the infants, the researchers are intended to implement a new initiative and are going to conduct some research in your locality. Under this research project, we will record information on pregnancy related issues from you. I assure you that, all information will be used for research purpose only and will be kept confidential.

You have every right to leave the interview at any time. In the circumstances, do you give your consent to collect information from you?

Has agreed

|   |
|---|
| 1 |
|---|

Has not agreed

|   |
|---|
| 2 |
|---|

INTERVIEWED BY: \_\_\_\_\_ SIGNATURE: \_\_\_\_\_
